# Supplementary material for: Revisiting the covalent nature of halogen bonding: a polarized three-center four-electron bond
Source: Royal Society of Chemistry journal article supplement (doi:10.1039/d1ra05695f), 2021-01-01
Supplement: d1ra05695f1.pdf [file d1ra05695f1.pdf]

# Supplementary Information

## Revisiting the covalent nature of halogen bonding: polarized three-center four-electron bond

Dan Li<sup>1</sup>, Tao Xia<sup>1</sup>, Wanwan Feng<sup>1</sup>, Longjiu Cheng<sup>1,2\*</sup>

<sup>1</sup>Department of Chemistry, Anhui University, Hefei, 230601, PR China

<sup>2</sup>Key Laboratory of Structure and Functional Regulation of Hybrid Materials (Anhui University),  
Ministry of Education, Hefei, 230601, PR China

\*Corresponding author. Email: clj@ustc.edu

### Contents

**Figure S1.** Full AdNDP bonding frameworks of  $I_3^-$

**Figure S2.** Full AdNDP bonding frameworks of  $I_2...I^-$  ( $I_1...I_2$  distance of 4.00 Å)

**Figure S3.** Full AdNDP bonding frameworks of  $I_2...I^-$  ( $I_1...I_2$  distance of 6.00 Å)

**Figure S4.** Plots of the reduced density gradient (RDF in a.u.) against the sign of the second Hessian eigenvalue multiplied by the electron density ( $\text{sign}(\lambda_2)\rho$ ) in a. u.) for  $I_3^-$  with NCI isosurfaces at 0.40

**Figure S5.** Plots of the reduced density gradient (RDF in a.u.) against the sign of the second Hessian eigenvalue multiplied by the electron density ( $\text{sign}(\lambda_2)\rho$ ) in a. u.) for  $I_2...I^-$  ( $I_1...I_2$  distance of 4.00 Å) with NCI isosurfaces at 0.40

**Figure S6.** Plots of the reduced density gradient (RDF in a.u.) against the sign of the second Hessian eigenvalue multiplied by the electron density ( $\text{sign}(\lambda_2)\rho$ ) in a. u.) for  $I_2...I^-$  ( $I_1...I_2$  distance of 6.00 Å) with NCI isosurfaces at 0.40

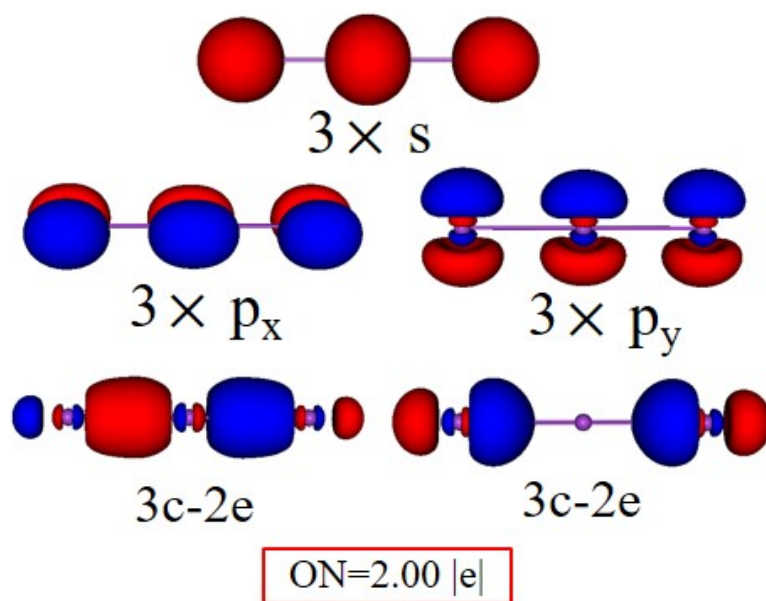

Figure S1. Full AdNDP bonding frameworks of  $I_3^-$

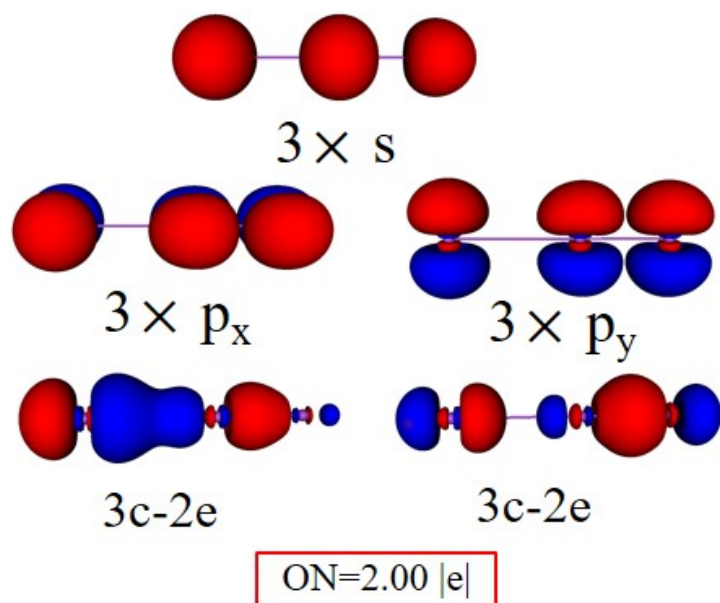

Figure S2. Full AdNDP bonding frameworks of I<sub>2</sub>...I<sup>-</sup> (I<sub>1</sub>...I<sub>2</sub> distance of 4.00 Å)

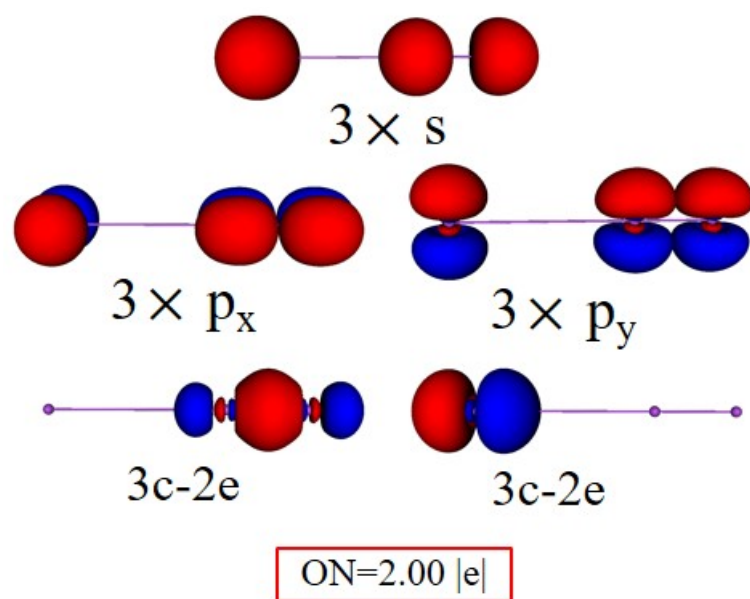

Figure S3. AdNDP bonding frameworks of I<sub>2</sub>...I<sup>-</sup> (I<sub>1</sub>...I<sub>2</sub> distance of 6.00 Å)

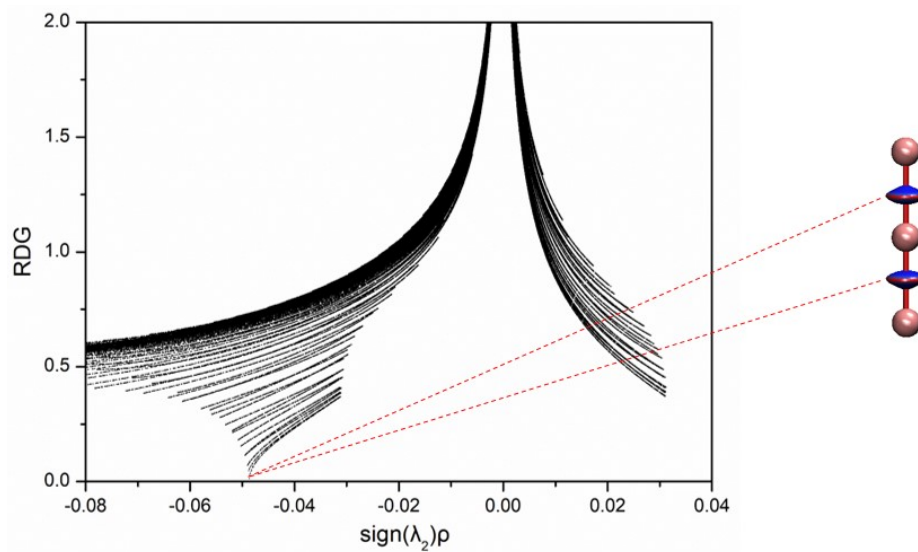

Figure S4. Plots of the reduced density gradient (RDF in a.u.) against the sign of the second Hessian eigenvalue multiplied by the electron density ( $\text{sign}(\lambda_2)\rho$  in a. u.) for  $\text{I}_3^-$  with NCI isosurfaces at 0.40

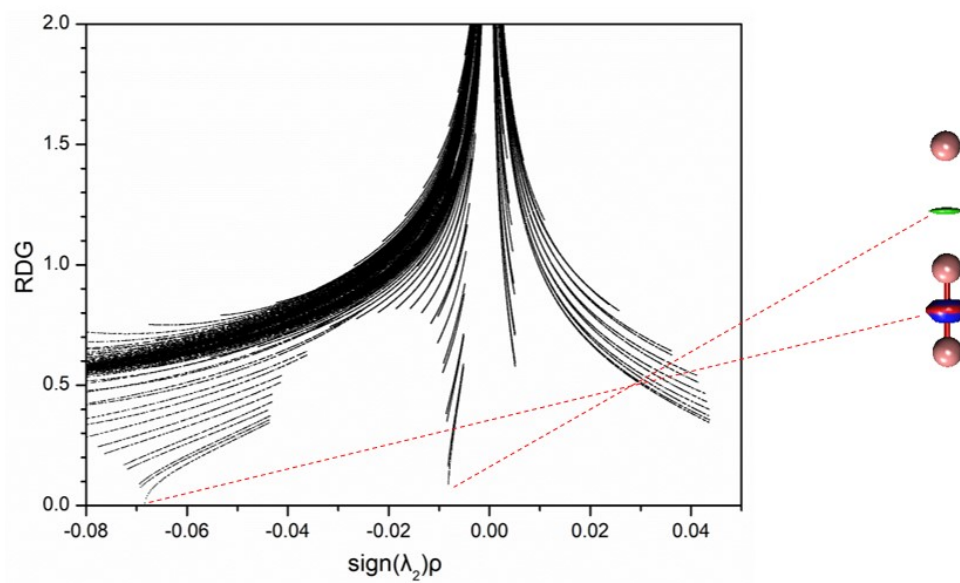

Figure S5. Plots of the reduced density gradient (RDG in a.u.) against the sign of the second Hessian eigenvalue multiplied by the electron density ( $\text{sign}(\lambda_2)\rho$ ) in a. u.) for  $\text{I}_2 \cdots \text{I}^-$  ( $\text{I}_1 \cdots \text{I}_2$  distance of 4.00 Å ) with NCI isosurfaces at 0.40

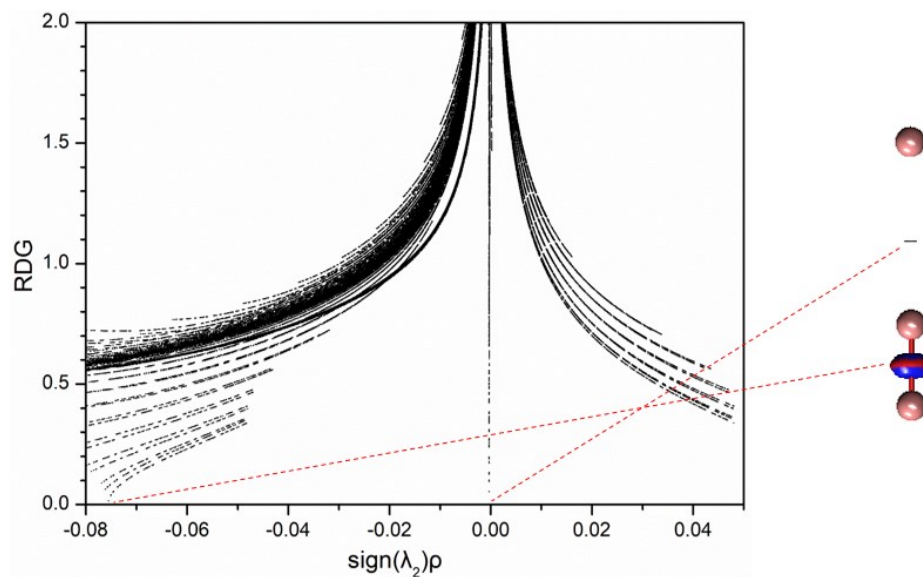

Figure S6. Plots of the reduced density gradient (RDG in a.u.) against the sign of the second Hessian eigenvalue multiplied by the electron density ( $\text{sign}(\lambda_2)\rho$ ) in a. u.) for  $\text{I}_2 \dots \text{I}^-$  ( $\text{I}_1 \dots \text{I}_2$  distance of 6.00 Å ) with NCI isosurfaces at 0.40
